# Supplementary material
Source: MDPI journal article supplement (https://www.mdpi.com/2073-4433/10/11/700)

# Supplementary Materials: Observational evidence of the transition from shallow to deep convection in the western Caribbean trade winds

Yanet Díaz-Esteban <sup>1,†,‡</sup>  and Graciela B. Raga <sup>1,†</sup> 

**Figure S1.** Diurnal cycle of surface variables for convection regimes SC and DC, using data from SuomiNet: (a) temperature, (b) relative humidity, (c) sea level pressure, (d) precipitable water vapor. Black and blue lines represent stations Mérida (-89.62°E; 20.98°N) and Cancún (-86.84°E; 21.02°N), respectively. The precipitable water is only plotted for Mérida due to lack of quality for data in Cancún station. These composites only covered the period 2011-2017, when SuomiNet data was available.

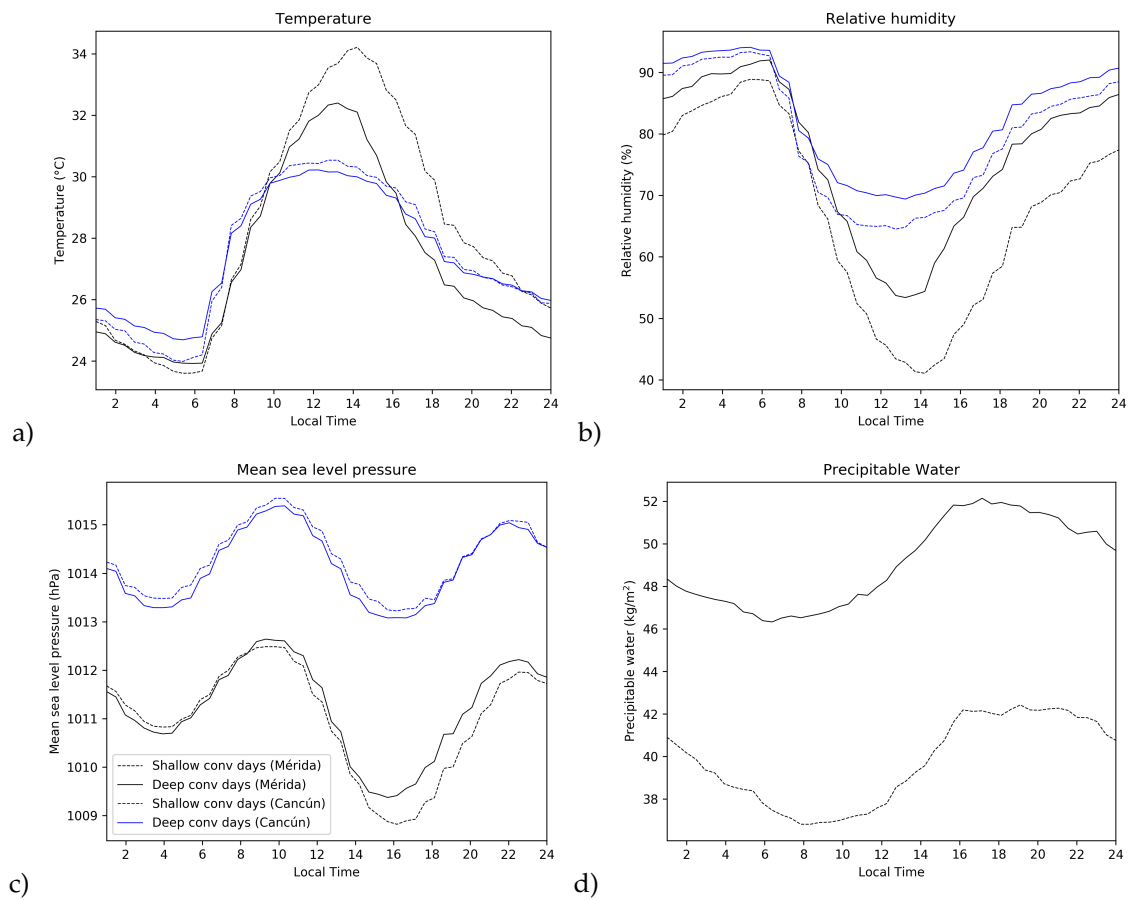

**Figure S2.** Vertical distribution of the diurnal cycle of temperature lapse rate for convection regimes: (a) SC, (b) DC.

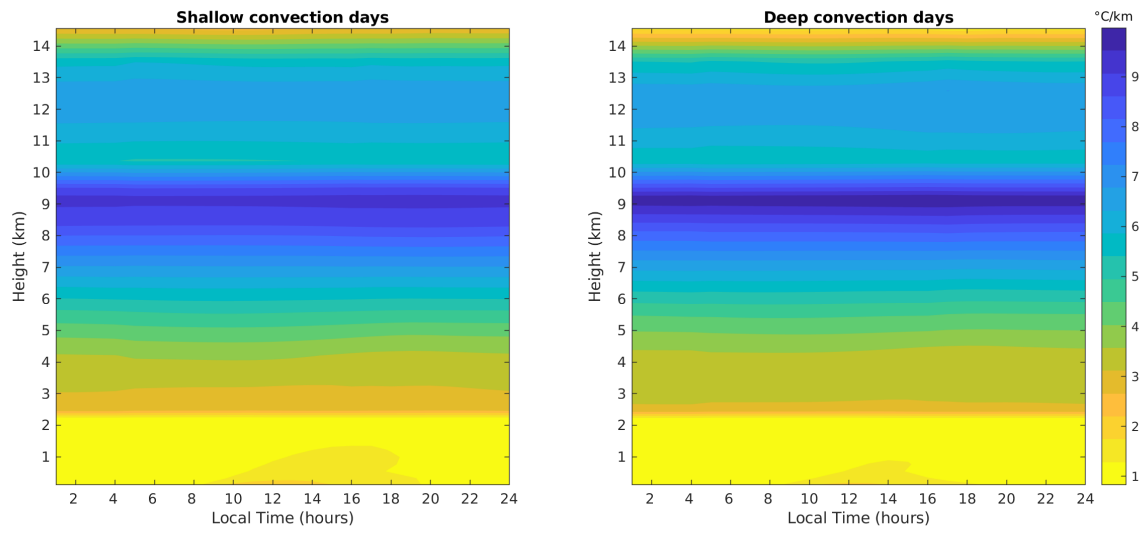

Supplement: s1 [file s1]
